# Supplementary material
Source: PubMed Central journal article supplement (PMC3426114)
Supplement: supp_tpc.112.100156_tpc100156Supplementalrev.pdf [file supp_tpc.112.100156_tpc100156Supplementalrev.pdf]

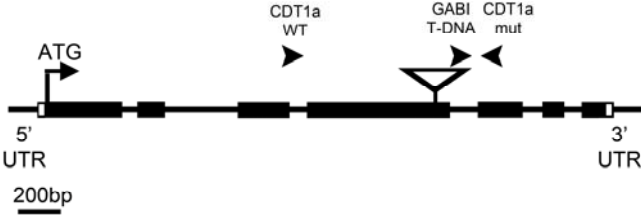

**Supplemental Figure 1:** Position of the T-DNA insertion in the GABI\_025G08 line.

Black boxes represent exons, black lines represent introns. Arrows indicate the position of primers used for genotyping.

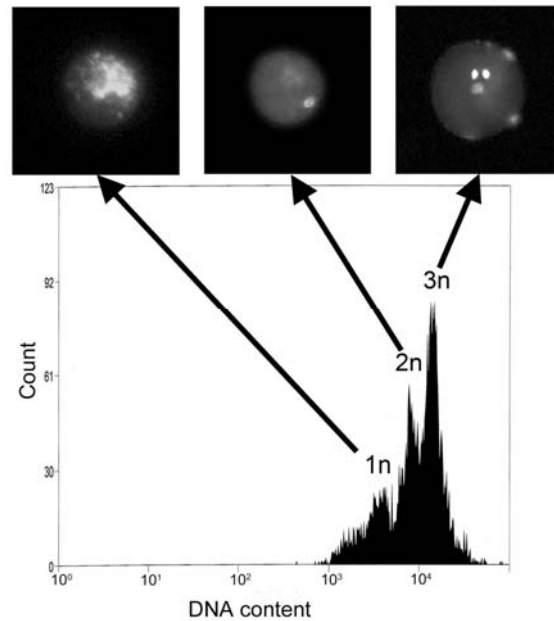

**Supplemental Figure 2:** DNA content in pollen grains isolated from a whole inflorescence of a Col-0 plant.

Pollen was extracted by dissecting anthers in 45 mM MgCl<sub>2</sub>, 30 mM sodium citrate, 20 mM MOPS, pH 7, and 0.1% Triton X-100 (Galbraith buffer, Galbraith *Science* 1983) with 5 µg/ml DAPI. DNA content of pollen was analyzed using a MoFlo XDP cytometer (Beckman Coulter) with a 405-nm solid state laser (30 mW) excitation and an emission collected after a 457/50-nm band-pass filter. For microscopy observation, pollen of different DNA levels were sorted using a purify mode with a drop envelop of one. This procedure was applied on pollen extracted from a whole inflorescence. Three major peaks labeled 1n, 2n and 3n could be identified, together with a smaller peak towards the lower DNA content. Microscopic observation of sorted pollen allowed us to confirm that the minor peak corresponded to cell debris while the 1n, 2n, and 3n peaks corresponded to one, two and three celled pollen grains respectively.

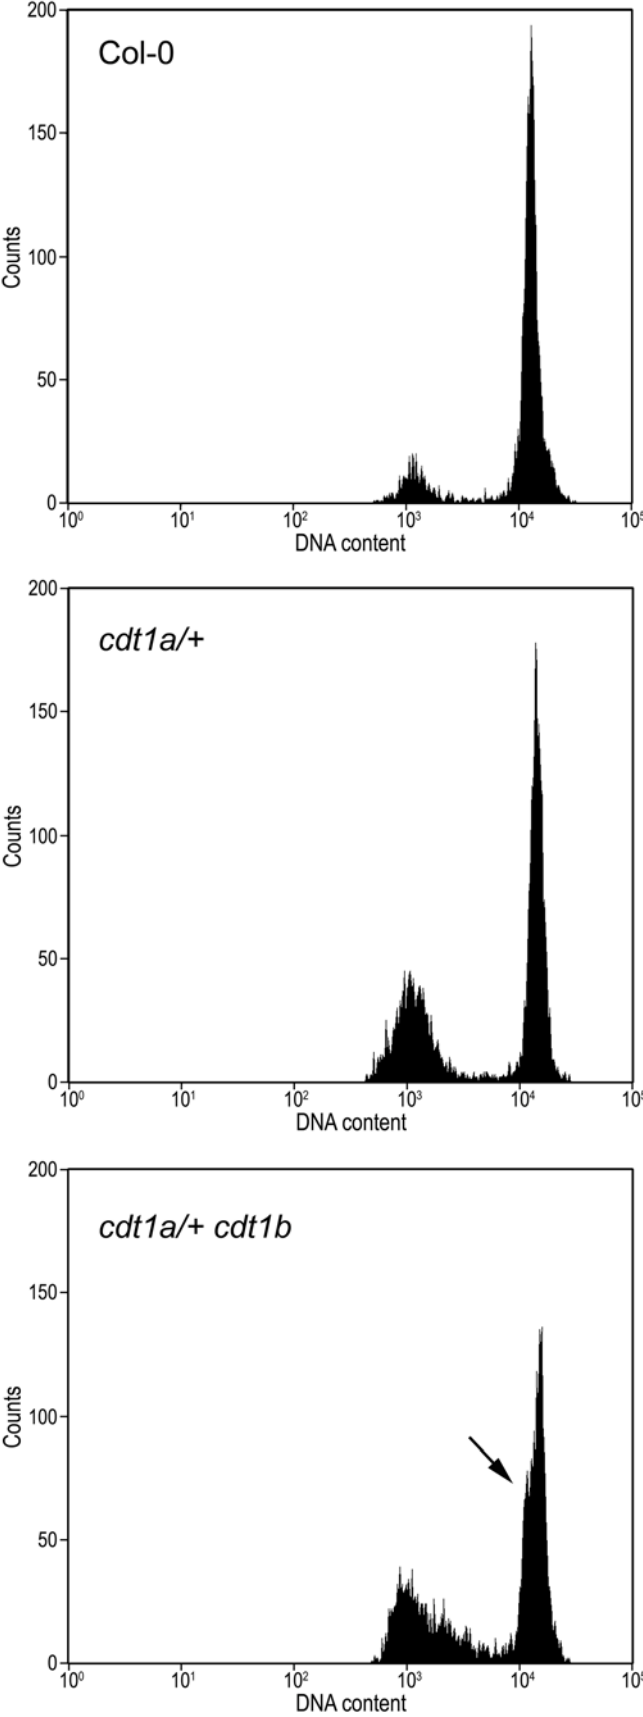

**Supplemental Figure 3:** Altered DNA content in pollen grains isolated from *cdt1a/+ cdt1b* mutants.

Then the same procedure as above was applied to pollen extracted from mature flowers to compare the DNA content of mature pollen grains in wild-type and mutant plants. In Col-0 and *cdt1a/+* plants, pollen grains distributed in a narrow peak corresponding to three cellular pollen grains. In *cdt1a/+ cdt1b* mutants, a shoulder appeared on this peak (black arrow) corresponding to abnormal pollen grains. Comparison with DNA content in two celled and three celled nuclei isolated from Col-0 flowers indicates that the DNA content of abnormal pollen grains is comprised between the DNA content of two celled and three celled pollen grains. The broader peak towards the lower DNA contents corresponds to cell debris and aborted pollen grains. The frequency of aborted pollen grains is higher both in *cdt1a/+* and *cdt1a/+ cdt1b* plants than in the wild type.

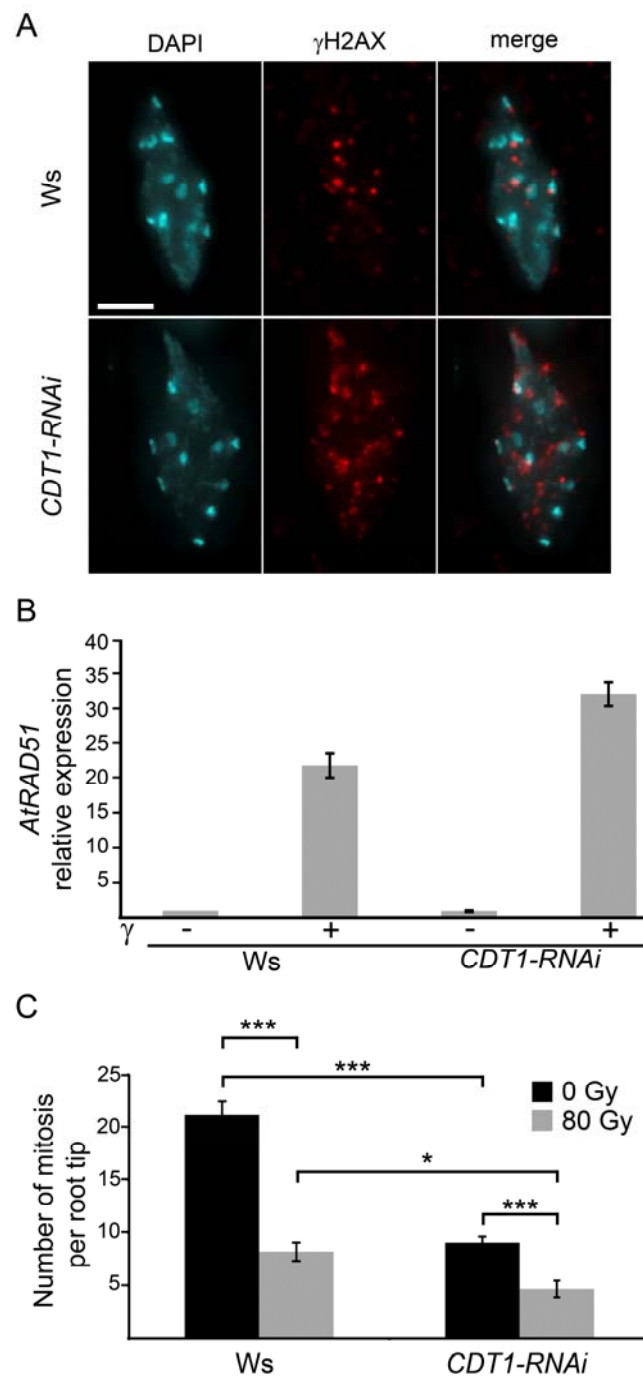

**Supplemental Figure 4:** Cellular response to DNA damage is normal in *CDT1-RNAi* plants

A: Immunofluorescence detection of phosphorylated H2AX in an isolated nucleus of Ws (top) and *CDT1-RNAi* (bottom) plantlets. One of the earliest responses to double-strand breaks is the accumulation of phosphorylated H2AX histones at the site of the break. We therefore measured phosphorylation of the H2AX histone variant after  $\gamma$ -irradiation by immuno-staining on isolated nuclei (see below for detailed procedure). No labelling could be detected in non-irradiated plants. As expected, phosphorylated H2AX is detected as discrete spots in the nuclei. Surprisingly, *CDT1-RNAi* showed a higher proportion of labelled nuclei than the wild-type

(47% vs 13% in the wild-type, n=150) and more intense labelling in the nuclei as illustrated on this Figure, suggesting that either more DSB are formed in these plants, or recognition of DSB occurs faster. Bar=5 $\mu$ m.

B: Q-RTPCR analysis of *RAD51* expression in the wild-type (WS) and *CDTI-RNAi* plants before (-) and after (+) gamma irradiation at 100 Gy. We asked whether later steps of DNA damage response were impaired. After DSB recognition, a signalling pathway induces the expression of genes involved in DNA repair such as *RAD51*. *RAD51* was induced in *CDTI-RNAi* plantlets, and this induction was even stronger than the one observed in the wild-type, suggesting that DSB sensing and response is functional in these plants. Bars are average +/- standard deviation. Data presented here are representative of two biological replicates.

C: Mitotic index in the root tip of wild-type (WS) and *CDTI-RNAi* plants before (blue bars) and after (red bars) gamma irradiation (40 Gy). We assessed the ability of *CDTI-RNAi* plants to induce cell cycle arrest upon DNA damage. To this end we measured the mitotic index in wild-type and *CDTI-RNAi* plants before and 90 minutes after  $\gamma$ -irradiation by counting mitotic events in the root tip of 20 plantlets. To this end, plantlets were fixed in paraformaldehyde (4% w/v), squashed on a glass plate and stained with DAPI. Mitotic events were counted using an epifluorescence microscope. In *CDTI-RNAi* root tips, the mitotic index was 1.5 times lower than in the wild-type, consistent with the previously reported delay in cell cycle progression in these lines ([Raynaud et al, 2005](#)). After gamma-irradiation, the mitotic index was reduced both in the wild-type and in *CDTI-RNAi* plants, indicating that their partial resistance to gamma rays is not due to an inability to stop cell cycle progression. Results are representative for two biological replicates.

Bars are average +/- standard error. Stars indicate significantly different values (\* Student t test, p value<0.05, \*\*\* p value<0.001) Data presented here are representative of two independent experiments.

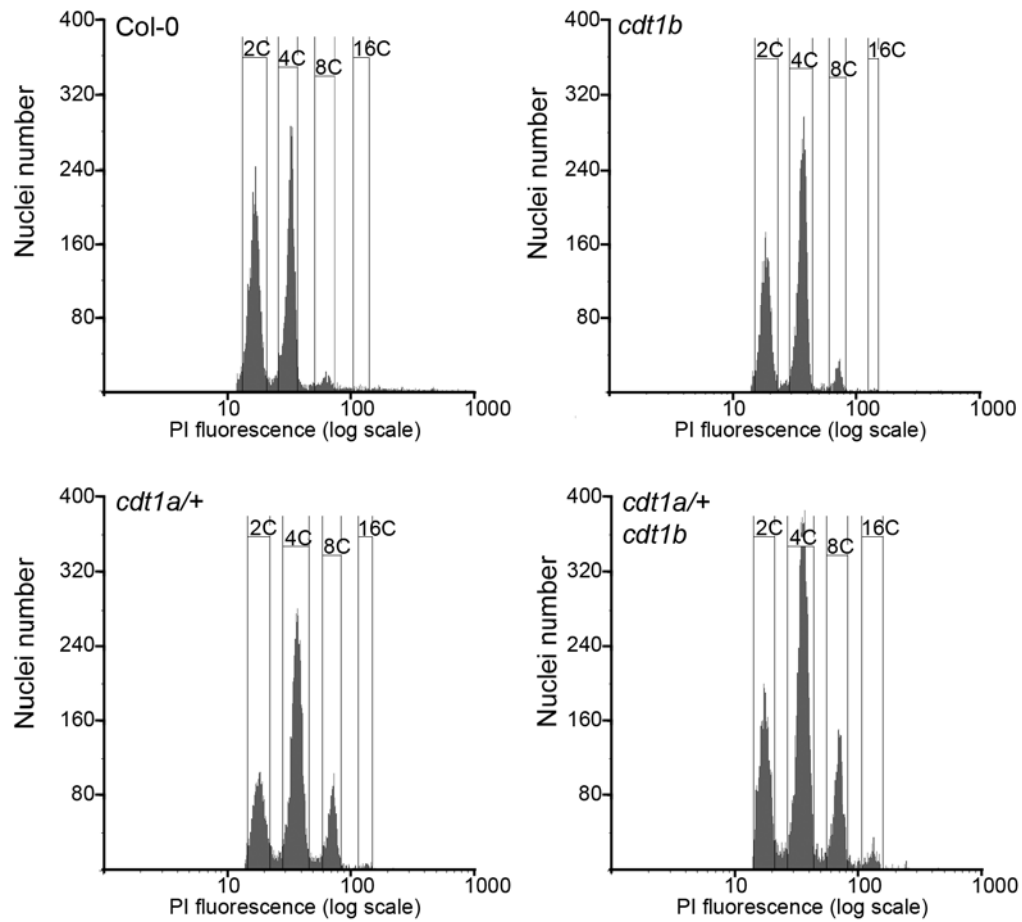

**Supplemental Figure 5:** Endoreduplication is increased in *cdt1a/+* and *cdt1a/+cdt1b* mutants.

Nuclei were isolated and their DNA content was analyzed by flow-cytometry as described in the material and methods section. DNA content was measured in at least 6000 nuclei isolated from the first leaf of plantlets harvested 14 days after stratification.

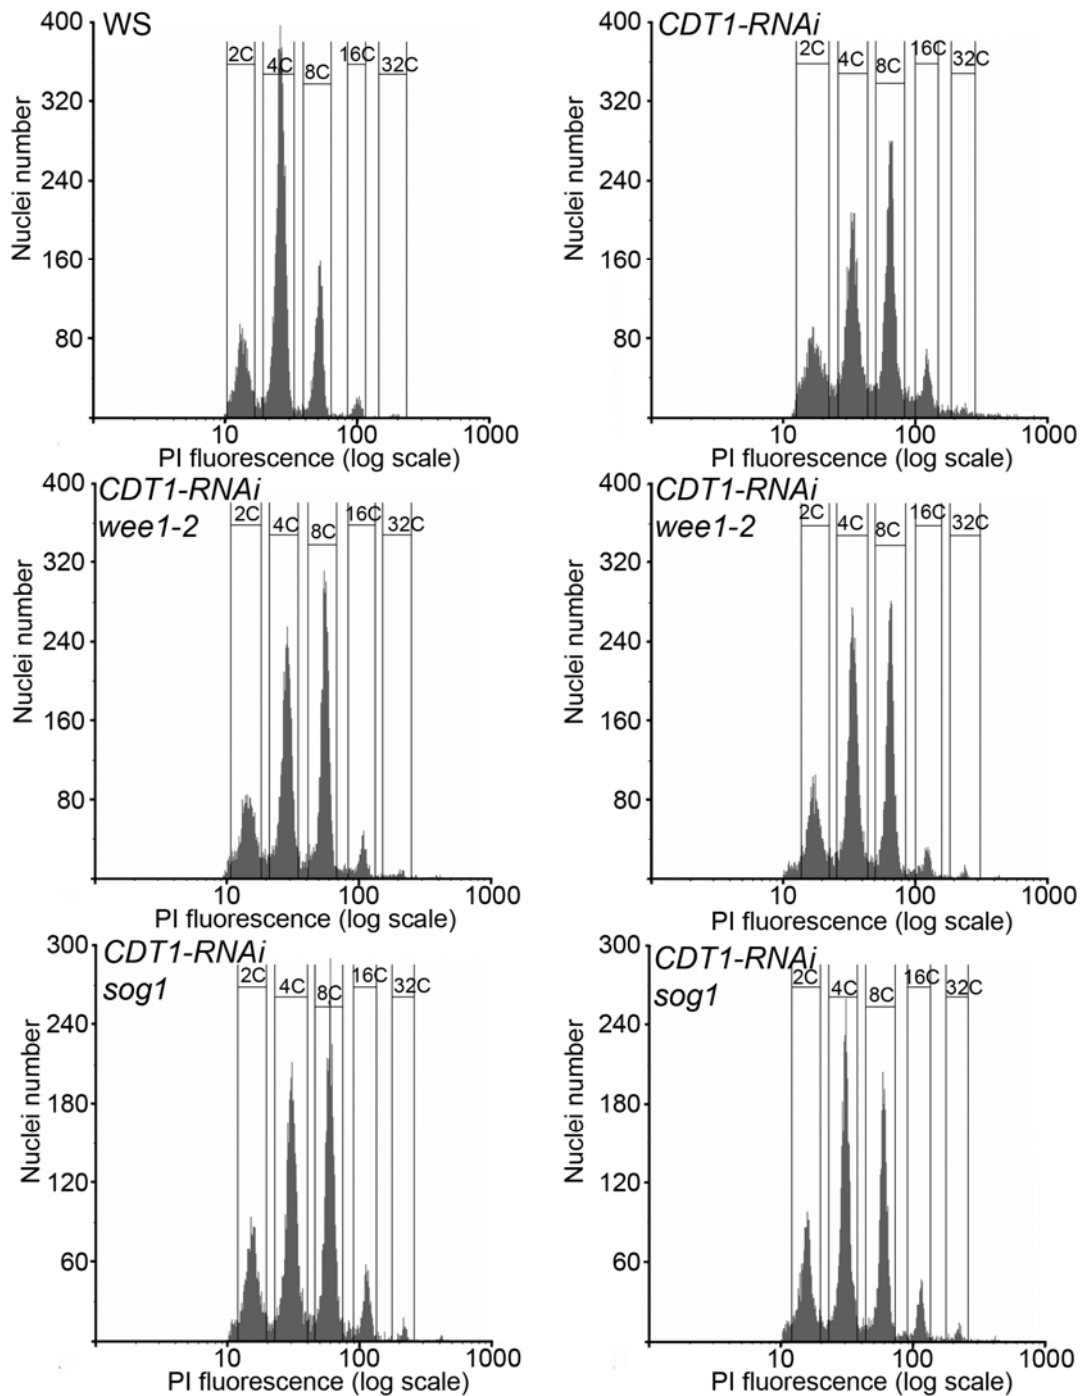

**Supplemental Figure 6:** Endoreduplication is enhanced in *CDT1-RNAi* plants in a *WEE1* and *SOG1* independent manner.

Nuclei were isolated and their DNA content was analyzed by flow-cytometry as described in the material and methods section. DNA content was measured in at least 6000 nuclei isolated from the first cauline leaf of plants. Two representative profiles are shown for *CDT1-RNAi wee1-2* and *CDT1-RNAi sog1* mutants to illustrate that the results are quite reproducible, although there is some variability from one plant to another.



**Supplemental Table I:** Detailed results for TAP analysis

Protein score: score calculated by the Mascot search engine for each protein. This score is based on the probability that peptide mass matches are non-random events. If the Protein Score is equal to or greater than the Mascot® Significance Level calculated for the database search, the protein match is considered to be statistically non-random at the 95% confidence interval. Protein score =  $-10 \cdot \log(P)$ , where P is the probability that the observed match is a random event

Expect: Protein score expectation value.

RMS error: RMS error of the set of matched mass values, in ppm.

Sequence coverage %: percentage of protein sequence covered by assigned peptide matches.

Unique peptides: number of peptides with unique sequences matching the selected protein.

Total Ion Score A: score calculated by weighting Ion Scores for all individual peptides matched to a given protein.

Peptide Number: Peptide index number within the list of peptides associated with a given protein.

Start: starting position of the peptide in the protein.

End: ending position of the peptide in the protein.

Observed: observed monoisotopic mass of the peptide in the spectrum (m/z).

Mr (Exp): experimental mass of the peptide calculated from the observed m/z value.

Mr (Calc): theoretical mass of the peptide based on its sequence.

Delta (Da): difference between the theoretical (Mr (Calc)) and experimental (Mr (Exp)) masses, in daltons.

Miss: Number of missed Trypsin cleavage sites.

Ions score: the Ions Score is calculated by the Mascot search engine for each peptide matched from MS/MS peak lists. This score is based on the probability that ion fragmentation matches are non-random events. If the Ion Score is equal to or greater than the Mascot® Significance Level calculated for the database search, the peptide match is considered to be statistically non-random at the 95% confidence interval. Ions score =  $-10 \cdot \log(P)$ , where P is the probability that the observed match is a random event.

Best Ions score: highest individual Ion Score for a given protein identification.

Expect: Ions score expectation value.

Peptide: amino acid sequence of the selected peptide.

Variable Modification: Variable modification type on the peptide.

| Bait  | Identification |                                    |                   |                             | PMF data           |                        |                    |                    | MS/MS data        |       |        |          |         |          |            |      |            |          | Variable Modification           |
|-------|----------------|------------------------------------|-------------------|-----------------------------|--------------------|------------------------|--------------------|--------------------|-------------------|-------|--------|----------|---------|----------|------------|------|------------|----------|---------------------------------|
|       | Locus          | Protein Name                       | # Found/<br># exp | Database Protein<br>version | RMS error<br>(ppm) | Sequence<br>coverage % | Unique<br>Peptides | Total<br>Ion Score | Peptide<br>Number | Start | End    | Observed | Mr(Exp) | Mr(Calc) | Delta (Da) | Miss | Ions Score | Expect   |                                 |
| CDT1a | ATG08260       | EMB2284, POL2A, TIL1, EMB529       | 22                | TAIR8                       | 452                | 2,10E+41               | 4                  | 27                 | 10                | 1954  | 1980   | 952.49   | 951.49  | 951.49   | 0.00       | 0    | 25         | 5.10E-02 | K.FDPPWK.F                      |
|       |                |                                    |                   |                             |                    |                        |                    |                    |                   | 637   | 643    | 1016.57  | 1015.56 | 1015.56  | -0.00      | 1    | 27         | 9.10E-02 | R.KLEWWR.G                      |
|       |                |                                    |                   |                             |                    |                        |                    |                    |                   | 1824  | 1830   | 1160.70  | 1159.59 | 1159.70  | -0.01      | 0    | 34         | 3.50E-03 | K.FALLTLDR.R                    |
|       |                |                                    |                   |                             |                    |                        |                    |                    |                   | 197   | 205    | 1177.56  | 1175.56 | 1175.56  | 0.00       | 0    | 30         | 2.00E-02 | R.EVDVYV.R/F                    |
|       |                |                                    |                   |                             |                    |                        |                    |                    |                   | 1784  | 1793   | 1192.63  | 1191.52 | 1191.62  | -0.00      | 0    | 30         | 2.70E-02 | K.NYADSLQR.L                    |
|       |                |                                    |                   |                             |                    |                        |                    |                    |                   | 1116  | 1124   | 1200.63  | 1199.52 | 1199.62  | -0.00      | 0    | 39         | 2.40E-03 | R.LDWISYTK.Q                    |
|       |                |                                    |                   |                             |                    |                        |                    |                    |                   | 722   | 731    | 1238.59  | 1238.58 | 1238.59  | -0.01      | 0    | 42         | 1.20E-03 | R.ENFYVDIVRS                    |
|       |                |                                    |                   |                             |                    |                        |                    |                    |                   | 86    | 85     | 1263.65  | 1262.54 | 1262.64  | -0.00      | 0    | 24         | 1.10E-01 | K.FRPYFAATK.D                   |
|       |                |                                    |                   |                             |                    |                        |                    |                    |                   | 33    | 44     | 1312.65  | 1311.54 | 1311.65  | -0.00      | 0    | 33         | 1.10E-02 | K.LGFLFSEGETR.L                 |
|       |                |                                    |                   |                             |                    |                        |                    |                    |                   | 1251  | 1261   | 1338.69  | 1335.58 | 1335.68  | -0.00      | 0    | 64         | 9.70E-06 | K.SYVQGMLELKK                   |
|       |                |                                    |                   |                             |                    |                        |                    |                    |                   | 1470  | 1484   | 1670.88  | 1669.87 | 1669.87  | -0.00      | 0    | 49         | 2.40E-04 | R.SPLVLYNSTIGR.A                |
|       |                |                                    |                   |                             |                    |                        |                    |                    |                   | 1521  | 1537   | 1865.91  | 1864.91 | 1864.91  | -0.01      | 0    | 65         | 4.20E-06 | R.DSCLLELSLSDLSWDGR.F           |
| CDT1a | ATG22110       | DBP2, CYL2                         | 22                | TAIR8                       | 452                | 2,10E+41               | 4                  | 27                 | 10                | 408   | 417    | 1362.68  | 1361.58 | 1361.68  | 0.00       | 0    | 62         | 1.80E-02 | K.FDPPWK.F                      |
|       |                |                                    |                   |                             |                    |                        |                    |                    |                   | 474   | 486    | 1453.80  | 1452.79 | 1452.90  | -0.01      | 0    | 51         | 1.10E-04 | R.LYPTHTMVGDK.S                 |
|       |                |                                    |                   |                             |                    |                        |                    |                    |                   | 382   | 405    | 1602.81  | 1601.80 | 1601.80  | -0.00      | 0    | 58         | 4.00E-05 | R.NIPNAFSSNPCR.V                |
|       |                |                                    |                   |                             |                    |                        |                    |                    |                   | 252   | 266    | 1628.75  | 1628.74 | 1628.75  | -0.00      | 0    | 115        | 4.60E-11 | K.HSEYDFGGTLT.K.E               |
|       |                |                                    |                   |                             |                    |                        |                    |                    |                   | 362   | 379    | 1913.02  | 1912.01 | 1912.01  | -0.00      | 0    | 94         | 5.00E-09 | R.RLFIQPEDAGPSTVLP.R.C          |
| CDT1a | ATG331270      | CDT1a                              | 22                | TAIR8                       | 88                 | 5,70E+05               | 9                  | 32                 | 13                | 1984  | 1990   | 962.60   | 961.49  | 961.49   | 0.00       | 0    | 31         | 1.80E-02 | K.FDPPWK.F                      |
|       |                |                                    |                   |                             |                    |                        |                    |                    |                   | 637   | 643    | 1016.57  | 1015.56 | 1015.56  | -0.00      | 1    | 32         | 1.90E-02 | R.KLEWWR.G                      |
|       |                |                                    |                   |                             |                    |                        |                    |                    |                   | 1824  | 1830   | 1160.70  | 1159.59 | 1159.70  | -0.00      | 0    | 37         | 1.40E-03 | K.VFALLTLDR.R                   |
|       |                |                                    |                   |                             |                    |                        |                    |                    |                   | 197   | 205    | 1177.57  | 1175.56 | 1175.56  | 0.00       | 0    | 48         | 3.30E-04 | R.EVDVYV.R/F                    |
|       |                |                                    |                   |                             |                    |                        |                    |                    |                   | 1784  | 1793   | 1192.63  | 1191.52 | 1191.62  | -0.00      | 0    | 24         | 9.50E-02 | K.NYADSLQR.L                    |
|       |                |                                    |                   |                             |                    |                        |                    |                    |                   | 1116  | 1124   | 1200.63  | 1199.52 | 1199.62  | 0.00       | 0    | 36         | 5.90E-03 | R.LDWISYTK.Q                    |
|       |                |                                    |                   |                             |                    |                        |                    |                    |                   | 722   | 731    | 1238.60  | 1238.59 | 1238.59  | -0.01      | 0    | 31         | 1.50E-02 | R.ENFYVDIVRS                    |
|       |                |                                    |                   |                             |                    |                        |                    |                    |                   | 86    | 85     | 1263.65  | 1262.54 | 1262.64  | -0.00      | 0    | 23         | 1.30E-01 | K.FRPYFAATK.D                   |
|       |                |                                    |                   |                             |                    |                        |                    |                    |                   | 33    | 44     | 1312.66  | 1311.55 | 1311.65  | 0.00       | 0    | 35         | 7.00E-03 | K.LGFLFSEGETR.L                 |
|       |                |                                    |                   |                             |                    |                        |                    |                    |                   | 1251  | 1261   | 1338.69  | 1335.58 | 1335.68  | 0.00       | 0    | 65         | 8.10E-06 | K.SYVQGMLELKK                   |
|       |                |                                    |                   |                             |                    |                        |                    |                    |                   | 141   | 153    | 1553.75  | 1552.75 | 1552.78  | -0.04      | 0    | 22         | 1.50E-01 | K.ISPDTVQQLMEV.R.R              |
|       |                |                                    |                   |                             |                    |                        |                    |                    |                   | 1470  | 1484   | 1670.88  | 1669.87 | 1669.87  | 0.00       | 0    | 65         | 5.90E-06 | R.SPLVLYNSTIGR.A                |
|       |                |                                    |                   |                             |                    |                        |                    |                    |                   | 1521  | 1537   | 1865.92  | 1864.92 | 1864.91  | 0.00       | 0    | 78         | 2.90E-07 | R.DSCLLELSLSDLSWDGR.F           |
| CDT1b | ATG22110       | DBP2, CYL2                         | 22                | TAIR8                       | 777                | 6,50E+74               | 5                  | 37                 | 14                | 135   | 141    | 894.49   | 893.48  | 893.48   | -0.00      | 0    | 31         | 2.20E-02 | R.FILLSOR.V                     |
|       |                |                                    |                   |                             |                    |                        |                    |                    |                   | 135   | 141    | 910.48   | 909.48  | 909.47   | 0.00       | 0    | (11)       | 1.90E-00 | R.FILLSOR.V                     |
|       |                |                                    |                   |                             |                    |                        |                    |                    |                   | 408   | 417    | 1362.68  | 1361.57 | 1361.68  | -0.00      | 0    | 60         | 2.80E-05 | K.FYNDEWFR.Q                    |
|       |                |                                    |                   |                             |                    |                        |                    |                    |                   | 474   | 496    | 1453.80  | 1452.79 | 1452.80  | -0.00      | 0    | 70         | 1.40E-06 | R.LYPTHTMVGDK.S                 |
|       |                |                                    |                   |                             |                    |                        |                    |                    |                   | 382   | 405    | 1602.80  | 1601.80 | 1601.80  | -0.00      | 0    | 71         | 1.80E-06 | R.NIPNAFSSNPCR.V                |
|       |                |                                    |                   |                             |                    |                        |                    |                    |                   | 252   | 266    | 1628.75  | 1628.74 | 1628.75  | -0.00      | 0    | 133        | 7.10E-13 | K.HSEYDFGGTLT.K.E               |
|       |                |                                    |                   |                             |                    |                        |                    |                    |                   | 111   | 127    | 1824.87  | 1823.86 | 1823.88  | -0.02      | 0    | 111        | 1.20E-10 | K.FIHTSPLPHGEASAK.T             |
|       |                |                                    |                   |                             |                    |                        |                    |                    |                   | 362   | 379    | 1913.01  | 1912.00 | 1912.01  | -0.00      | 0    | 111        | 1.10E-10 | R.RLFIQPEDAGPSTVLP.R.C          |
|       |                |                                    |                   |                             |                    |                        |                    |                    |                   | 278   | 299    | 2624.26  | 2623.25 | 2623.25  | 0.01       | 0    | 33         | 7.00E-03 | R.OAVNDIVLSDIMDDDEEVMR.K        |
|       |                |                                    |                   |                             |                    |                        |                    |                    |                   | 7.4   | 101    | 2862.53  | 2861.52 | 2861.52  | 0.00       | 0    | 50         | 6.80E-05 | R.LLGAHNPPEETTSASLAIIDAFLV.PK.F |
| CDT1b | ATG27470       | CCAAT-box binding transcription fa | 22                | TAIR8                       | 910                | 3,30E+87               | 7                  | 58                 | 25                | 6     | 17     | 1322.80  | 1321.79 | 1321.80  | -0.01      | 0    | 36         | 5.60E-04 | K.VVDELPLAVR.R                  |
|       |                |                                    |                   |                             |                    |                        |                    |                    |                   | 89    | 908.49 | 907.48   | 907.48  | 907.48   | 0.00       | 0    | 31         | 2.20E-02 | K.IEYLNRI                       |
|       |                |                                    |                   |                             |                    |                        |                    |                    |                   | 419   | 429    | 1270.71  | 1269.70 | 1269.70  | -0.00      | 0    | 63         | 8.10E-06 | K.IANQINIDR.R                   |
|       |                |                                    |                   |                             |                    |                        |                    |                    |                   | 172   | 183    | 1428.76  | 1425.75 | 1425.73  | 0.03       | 0    | 38         | 2.60E-03 | K.ELLPEPNSPQR.D                 |
|       |                |                                    |                   |                             |                    |                        |                    |                    |                   | 389   | 400    | 1453.82  | 1452.82 | 1452.83  | -0.02      | 0    | 69         | 1.20E-06 | K.HNLPQLVNLHR.V                 |
|       |                |                                    |                   |                             |                    |                        |                    |                    |                   | 184   | 198    | 1507.76  | 1506.75 | 1506.76  | -0.00      | 0    | 46         | 5.50E-04 | R.DSYGNSVGLGEPK.L               |
|       |                |                                    |                   |                             |                    |                        |                    |                    |                   | 472   | 486    | 1717.87  | 1716.86 | 1716.87  | -0.01      | 1    | 64         | 6.90E-06 | R.ARLEEATSHDISLIJ.-             |
|       |                |                                    |                   |                             |                    |                        |                    |                    |                   | 50    | 65     | 1913.96  | 1912.96 | 1912.96  | -0.00      | 0    | 115        | 6.60E-11 | R.FELLEFFNGLDTAR.L              |
|       |                |                                    |                   |                             |                    |                        |                    |                    |                   | 167   | 183    | 2009.03  | 2008.03 | 2008.03  | 0.00       | 1    | 85         | 4.90E-08 | K.DEPKELLPEPNSPQR.D             |
|       |                |                                    |                   |                             |                    |                        |                    |                    |                   | 364   | 400    | 2030.12  | 2037.11 | 2037.11  | -0.00      | 1    | 111        | 0.69E-11 | K.IPEKSHIIPOLYVLR.V             |
|       |                |                                    |                   |                             |                    |                        |                    |                    |                   | 46    | 55     | 2409.24  | 2408.24 | 2408.24  | -0.00      | 1    | 49         | 2.10E-04 | K.LPERFELEFFNGLDTAR.L           |

**Supplemental Table II:** Primers sequences

Where applicable, restriction sites introduced in primers are underlined.

| Primer name                 | Sequence 5' ->3'                    |
|-----------------------------|-------------------------------------|
| Primers used for genotyping |                                     |
| GABI T-DNA                  | CGCCTATAAATACGACGGATCG              |
| CDT1a mut                   | CAAGCTCTTCTTTTGTGATAACCC            |
| CDT1a WT                    | CCCTCAGGTATAATGCCCTATCTATTTTAG      |
| HLK3mut                     | GGGGTCTAATTGTGCACACGTG              |
| Primers used for cloning    |                                     |
| HA-dir                      | GTTGGTACCTACCCATACGATGTTTCCT        |
| HA-rev                      | TCGAGCTCAGCGTAATCTGGAACGTCATATGG    |
| pCDT1-HindIII               | TCAAGCTTGAATAGGGATGTGGTAATATTC      |
| pCDT1-XbaI                  | AATGGATCTAGAAGAGCCTGGTGTACT         |
| CDT1-ClaI                   | CAATGTCATCCATTACTTAATTC             |
| CDT1a-KpnI                  | CTGGTACCAGAAAGCAGTGGAGCCATCTC       |
| CDT1a KpnI dir              | GCGGTACCATGAGTACACCAGGCTCT          |
| CDT1a EcoRI rev             | CGGAATTCGAAAGCAGTGGAGCCATCTC        |
| CDT1b KpnI dir              | GCGGTACCATGAGCTCGTCGTCTAAAATTG      |
| CDT1b EcoRI rev             | GCGAATTCCCCTAGATAAGTGAAATGTC        |
| CDT1a rev stop              | CGGAATTCCTCAAGAAAGCAGTGGAGCCATC     |
| CDT1b rev stop              | GCGGAATTCAGTAGATAAGTGAAATGTC        |
| Pol ε EcoRI dir             | GGGAATTCATGAGCAGCACCAGTCAGAAGAGG    |
| Pol ε XhoI stop             | TCCTCGAGTCACAAAGCAGAGAGTTTCTGACTTCT |
| Primers used for qRT-PCR    |                                     |
| CYCB1;1 F                   | GGAAGCAACAAGAAGAAGGGAG              |
| CYCB1;1 R                   | AGGGATCAAAGCCACAGCG                 |
| RAD51 F                     | CTTAGGGATGCTGGTCTCTGTAC             |
| RAD51 R                     | GTCAACCTTGGCATCACTAATTC             |
| PARP2 F                     | AGCCTGAAGGCCCGGGTAACA               |
| PARP2 R                     | GCTGTCTCAGTTTTGGCTGCCG              |
| BRCA1 F                     | AGGTGAACCTGTCTCTGCGGATTT            |
| BRCA1 R                     | TTCTCCGGCTTCTTGTCAACTCCA            |
| KU70 F                      | GGTGTAGCTGCTCCTCGCGC                |
| KU70 R                      | GCATAGTGTCTCTGCAAAGCGGG             |
| XRCC4 F                     | AGAAGAGCGAGGAAGAAGCCTCAA            |
| XRCC4 R                     | AACTCTGACCTGAAAATCTCACGGC           |
| PDF2 F                      | TAACGTGGCCAAAATGATGC                |
| PDF2 R                      | GTTCTCCACAACCGCTTGGT                |

**Supplemental methods: Immuno-fluorescence**

Immuno-detection of the phosphorylated H2AX protein in the wild-type (WS) and CDT1-RNAi plants was performed 15 minutes after  $\gamma$ -irradiation (100 Gy). Seedlings were fixed in PFA 4% in PHEM (PIPES 60mM ; HEPES 25mM ; EGTA 10mM ; MgCl<sub>2</sub> 2mM pH 6.9) during 1 hour at room temperature (apply vacuum 20 min to facilitate uptake of the fixation solution). Seedlings were washed 5 min in PHEM and 5 min in PBS pH6.9 and chopped on a petri dish in PBS supplemented with 0.1% triton (w/v). The mixture was filtered (50 $\mu$ m) and centrifugated 10 min at 2000g. Supernatant was carefully removed and pellet was washed once with PBS, gently resuspended in 20 $\mu$ l PBS and a drop was placed on a poly-lysine slide and air dried. Slides were rehydrated with PBS and permealized 2 times by 10min incubation in PBST (PBS, 0.1% Tween20 v/v). Slides were placed in a moist chamber and incubated overnight at 4°C with the primary antibody (Abcam, rabbit gammaH2A.X (phosphor S139)), diluted (1/250 v/v) in PBST supplemented with BSA (3% w/v). Slides were washed 5 x 10 min in PBST (at RT) and incubated 1 h at RT in the dark with the secondary antibody (A11037 Invitrogen, Alexa Fluor 594 goat anti-rabbit) diluted (1/400 v/v) in PBST, 3% BSA. Slides were washed 5x 10 min in PBST. Slides were mounted with a drop of Vectashield with DAPI and observed as described for pollen mitosis analysis with the suitable cube fluorescence filters (BP340-380, DS 400, BP 450-490 for DAPI) (BP570-590, DS595, BP 605-655 for A594). .
